# Supplementary material for: Association of the 2020 US Presidential Election With Hospitalizations for Acute Cardiovascular Conditions
Source: PubMed Central journal article supplement (PMC9021908; doi:10.1001/jamanetworkopen.2022.8031), 2022-04-20
Supplement: jamanetwopen-e228031-s001.pdf [file jamanetwopen-e228031-s001.pdf]

## Supplemental Online Content

Mefford MT, Rana JS, Reynolds K, et al. Association of the 2020 US presidential election with hospitalizations for acute cardiovascular conditions. *JAMA Netw Open*. 2022;5(4):e228031. doi:10.1001/jamanetworkopen.2022.8031

**eTable 1.** Hospitalization for Acute Cardiovascular Disease (CVD) Events in the 5 Days Following the 2020 Presidential Election to the Same Days of the Week Before the Election, by KP Region.

**eTable 2.** Hospitalization for Acute Cardiovascular Disease (CVD) Events in the 5 Days Following the 2020 Presidential Election (November 4-8) to the Same Days of the Week Two and Three Weeks Before the Election (October 14-18 and 21-25)

**eTable 3.** Hospitalization for Acute Myocardial Infarction, Stroke, and Heart Failure in the 5 Days Following the 2020 Presidential Election (November 4-8) to the Same Days of the Week Two and Three Weeks Before the Election (October 14-18 and 21-25)

**eTable 4.** Hospitalization for Acute Cardiovascular Disease (CVD) Events in the 5 Days Following the 2020 Presidential Election to the Same Days of the Week Before the Election—Excluding Patients with COVID-19 During the Same Encounter

**eTable 5.** Hospitalization for Acute Myocardial Infarction, Stroke, and Heart Failure Following the 2020 Presidential Election Compared to the Same Days of the Week Before The Election—Excluding Patients With COVID-19 During the Same Encounter

This supplemental material has been provided by the authors to give readers additional information about their work.

eTable 1. Hospitalization for acute cardiovascular disease (CVD) events in the 5 days following the 2020 presidential election to the same days of the week before the election, by KP region.

|                | November 4-8<br>(Risk Window) |                  |                                     | October 21-25<br>(Control Window) |                  |                                     | Rate Ratio<br>(95% CI) | P-Value |
|----------------|-------------------------------|------------------|-------------------------------------|-----------------------------------|------------------|-------------------------------------|------------------------|---------|
|                | Events, N                     | Person-<br>Years | Rate per<br>100,000<br>person-years | Events, N                         | Person-<br>Years | Rate per<br>100,000<br>person-years |                        |         |
| <b>All CVD</b> |                               |                  |                                     |                                   |                  |                                     |                        |         |
| <b>KPSC</b>    | 389                           | 44,357.19        | 876.972                             | 312                               | 44,469.78        | 701.600                             | 1.25 (1.08, 1.45)      | 0.207   |
| <b>KPNC</b>    | 277                           | 43,220.63        | 640.900                             | 257                               | 43,342.68        | 592.950                             | 1.08 (0.91,1.28)       |         |
| <b>AMI</b>     |                               |                  |                                     |                                   |                  |                                     |                        |         |
| <b>KPSC</b>    | 96                            | 44,357.19        | 216.425                             | 63                                | 44,469.78        | 141.669                             | 1.53 (1.11, 2.10)      | 0.533   |
| <b>KPNC</b>    | 83                            | 43,220.63        | 192.040                             | 63                                | 43,342.68        | 145.35                              | 1.32 (0.95,1.83)       |         |
| <b>Stroke</b>  |                               |                  |                                     |                                   |                  |                                     |                        |         |
| <b>KPSC</b>    | 176                           | 44,357.19        | 396.779                             | 154                               | 44,469.78        | 346.303                             | 1.14 (0.92, 1.42)      | 0.079   |
| <b>KPNC</b>    | 89                            | 43,220.63        | 205.920                             | 107                               | 43,342.68        | 246.87                              | 0.83 (0.63,1.10)       |         |
| <b>HF</b>      |                               |                  |                                     |                                   |                  |                                     |                        |         |
| <b>KPSC</b>    | 130                           | 44,357.19        | 293.075                             | 109                               | 44,469.78        | 245.110                             | 1.19 (0.93, 1.54)      | 0.884   |
| <b>KPNC</b>    | 109                           | 43,220.63        | 252.190                             | 94                                | 43,342.68        | 216.880                             | 1.16 (0.88,1.53)       |         |

Abbreviations: AMI, acute myocardial infarction; CI, confidence interval; CVD, cardiovascular disease; HF, heart failure; KPNC, Kaiser Permanente Northern California; KPSC, Kaiser Permanente Southern California

eTable 2. Hospitalization for acute cardiovascular disease (CVD) events in the 5 days following the 2020 presidential election (November 4-8) to the same days of the week two and three weeks before the election (October 14-18 and 21-25).

|                        | November 4-8<br>(Risk Window) |              |                               | October 14-18 & 21-25<br>(Control Window) |              |                               | Rate Ratio<br>(95% CI) | P-value |
|------------------------|-------------------------------|--------------|-------------------------------|-------------------------------------------|--------------|-------------------------------|------------------------|---------|
|                        | Events, N                     | Person-Years | Rate per 100,000 person-years | Events, N                                 | Person-Years | Rate per 100,000 person-years |                        |         |
| <b>Overall</b>         | 666                           | 87,577.82    | 760.47                        | 1,132                                     | 175,599.13   | 644.65                        | 1.18 (1.09, 1.30)      |         |
| <b>Age, years</b>      |                               |              |                               |                                           |              |                               |                        |         |
| 18-54                  | 87                            | 54,345.96    | 160.09                        | 139                                       | 109,068.75   | 127.44                        | 1.26 (0.96, 1.64)      | 0.32    |
| 55-74                  | 278                           | 25,964.30    | 1,070.7                       | 514                                       | 51,988.20    | 988.69                        | 1.08 (0.94, 1.25)      |         |
| 75+                    | 301                           | 7,267.56     | 4,141.69                      | 479                                       | 14,542.18    | 3,293.87                      | 1.26 (1.09, 1.45)      |         |
| <b>Sex</b>             |                               |              |                               |                                           |              |                               |                        |         |
| Male                   | 388                           | 40,721.97    | 952.80                        | 606                                       | 81,684.27    | 741.88                        | 1.28 (1.13, 1.46)      | 0.05    |
| Female                 | 278                           | 46,855.85    | 593.31                        | 526                                       | 93,914.86    | 560.08                        | 1.05 (0.92, 1.23)      |         |
| <b>Race/Ethnicity</b>  |                               |              |                               |                                           |              |                               |                        |         |
| Asian/Pacific Islander | 87                            | 14,828.56    | 586.71                        | 155                                       | 29,703.92    | 521.82                        | 1.12 (0.86, 1.46)      | 0.80    |
| Black                  | 89                            | 6,922.46     | 1,285.67                      | 157                                       | 13,877.62    | 1,131.32                      | 1.14 (0.88, 1.47)      |         |
| Hispanic               | 150                           | 28,771.25    | 521.35                        | 270                                       | 57,641.41    | 468.41                        | 1.11 (0.92, 1.36)      |         |
| Other                  | 4                             | 887.27       | 450.82                        | 10                                        | 1,779.20     | 562.05                        | --                     |         |
| White                  | 336                           | 36,168.29    | 928.99                        | 540                                       | 72,596.97    | 743.83                        | 1.25 (1.09, 1.43)      |         |

Abbreviation: CI, confidence interval

\*Other race/ethnicity includes Native American Alaskan, multiple ethnicities, and those not specified as above.

eTable 3. Hospitalization for acute myocardial infarction, stroke, and heart failure in the 5 days following the 2020 presidential election (November 4-8) to the same days of the week two and three weeks before the election (October 14-18 and 21-25).

|                      | November 4-8<br>(Risk Window) |              |                                     | October 14-18 & 21-25<br>(Control Window) |              |                                     | Rate Ratio<br>(95% CI) |
|----------------------|-------------------------------|--------------|-------------------------------------|-------------------------------------------|--------------|-------------------------------------|------------------------|
|                      | Events, N                     | Person-Years | Rate per<br>100,000<br>person-years | Events, N                                 | Person-Years | Rate per<br>100,000<br>person-years |                        |
| <b>AMI</b>           | 179                           | 87,577.82    | 204.39                              | 279                                       | 175,599.13   | 158.89                              | 1.29 (1.07, 1.55)      |
| <b>Stroke</b>        | 265                           | 87,577.82    | 302.59                              | 500                                       | 175,599.13   | 284.74                              | 1.06 (0.92, 1.23)      |
| <b>Heart Failure</b> | 239                           | 87,577.82    | 272.90                              | 383                                       | 175,599.13   | 218.11                              | 1.25 (1.06, 1.47)      |

Abbreviation: AMI, acute myocardial infarction; CI, confidence interval

eTable 4. Hospitalization for acute cardiovascular disease (CVD) events in the 5 days following the 2020 presidential election to the same days of the week before the election— excluding patients with COVID-19 during the same encounter.

|                        | November 4-8<br>(Risk Window) |              |                               | October 21-25<br>(Control Window) |              |                               | Rate Ratio<br>(95% CI) | P-value |
|------------------------|-------------------------------|--------------|-------------------------------|-----------------------------------|--------------|-------------------------------|------------------------|---------|
|                        | Events, N                     | Person-Years | Rate per 100,000 person-years | Events, N                         | Person-Years | Rate per 100,000 person-years |                        |         |
| <b>Overall</b>         | 654                           | 87,577.82    | 746.76                        | 561                               | 87,812.46    | 638.86                        | 1.17 (1.04, 1.31)      |         |
| <b>Age, years</b>      |                               |              |                               |                                   |              |                               |                        |         |
| 18-54                  | 85                            | 54,345.96    | 156.41                        | 67                                | 54,533.92    | 122.86                        | 1.27 (0.92, 1.75)      | 0.11    |
| 55-74                  | 273                           | 25,964.30    | 1051.44                       | 268                               | 26,000.44    | 1,030.75                      | 1.02 (0.86, 1.21)      |         |
| 75+                    | 296                           | 7,267.56     | 4,072.89                      | 226                               | 7,278.1      | 3,105.21                      | 1.31 (1.10, 1.56)      |         |
| <b>Sex</b>             |                               |              |                               |                                   |              |                               |                        |         |
| Male                   | 382                           | 40,721.97    | 938.07                        | 295                               | 40,848.65    | 722.18                        | 1.30 (1.12, 1.51)      | 0.04    |
| Female                 | 272                           | 46,855.85    | 580.50                        | 266                               | 46,963.81    | 566.39                        | 1.02 (0.87, 1.21)      |         |
| <b>Race/Ethnicity</b>  |                               |              |                               |                                   |              |                               |                        |         |
| Asian/Pacific Islander | 85                            | 14,828.56    | 573.22                        | 84                                | 14,854.03    | 565.50                        | 1.01 (0.74, 1.37)      | 0.53    |
| Black                  | 88                            | 6,922.46     | 1,271.23                      | 83                                | 6,939.75     | 1,196.01                      | 1.06 (0.79, 1.44)      |         |
| Hispanic               | 146                           | 28,771.25    | 507.45                        | 128                               | 28,826.69    | 444.03                        | 1.14 (0.90, 1.45)      |         |
| Other                  | 4                             | 887.27       | 450.82                        | 6                                 | 889.91       | 674.23                        | --                     |         |
| White                  | 331                           | 36,168.29    | 915.17                        | 260                               | 36,302.09    | 716.21                        | 1.28 (1.09, 1.50)      |         |

Abbreviation: CI, confidence interval

\*Other race/ethnicity includes Native American Alaskan, multiple ethnicities, and those not specified as above.

eTable 5. Hospitalization for acute myocardial infarction, stroke, and heart failure following the 2020 presidential election compared to the same days of the week before the election– excluding patients with COVID-19 during the same encounter.

|                      | November 4-8<br>(Risk Window) |              |                                     | October 21-25<br>(Control Window) |              |                                     | Rate Ratio<br>(95% CI) |
|----------------------|-------------------------------|--------------|-------------------------------------|-----------------------------------|--------------|-------------------------------------|------------------------|
|                      | Events, N                     | Person-Years | Rate per<br>100,000<br>person-years | Events, N                         | Person-Years | Rate per<br>100,000<br>person-years |                        |
| <b>AMI</b>           | 177                           | 87,577.82    | 202.106                             | 123                               | 87,812.46    | 140.071                             | 1.44 (1.15, 1.82)      |
| <b>Stroke</b>        | 257                           | 87,577.82    | 293.453                             | 256                               | 87,812.46    | 291.53                              | 1.01 (0.85, 1.20)      |
| <b>Heart Failure</b> | 237                           | 87,577.82    | 270.616                             | 202                               | 87,812.46    | 230.036                             | 1.18 (0.98, 1.42)      |

Abbreviation: AMI, acute myocardial infarction; CI, confidence interval
